# Supplementary material for: TGF-β Signalling Mediates the Anti-Inflammatory Activity of Enamel Matrix Derivative In Vitro
Source: MDPI journal article supplement (doi:10.3390/ijms23179778), 2022-08-29

## Supplement figures

**Figure S1:** Dose-response of EMD concentrations on the viability (MTT test) of RAW 264.7 macrophages.

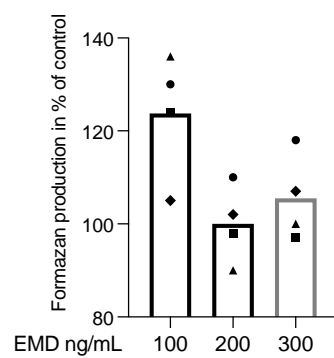

Supplement: s1 [file s1]
